# Supplementary material for: Synthesis, antifungal evaluation, and safety assessment of mesoporous silica nanoparticles loaded with prothioconazole against crop pathogens
Source: Royal Society of Chemistry journal article supplement (doi:10.1039/d2en00226d), 2022-01-01

Zero-order model

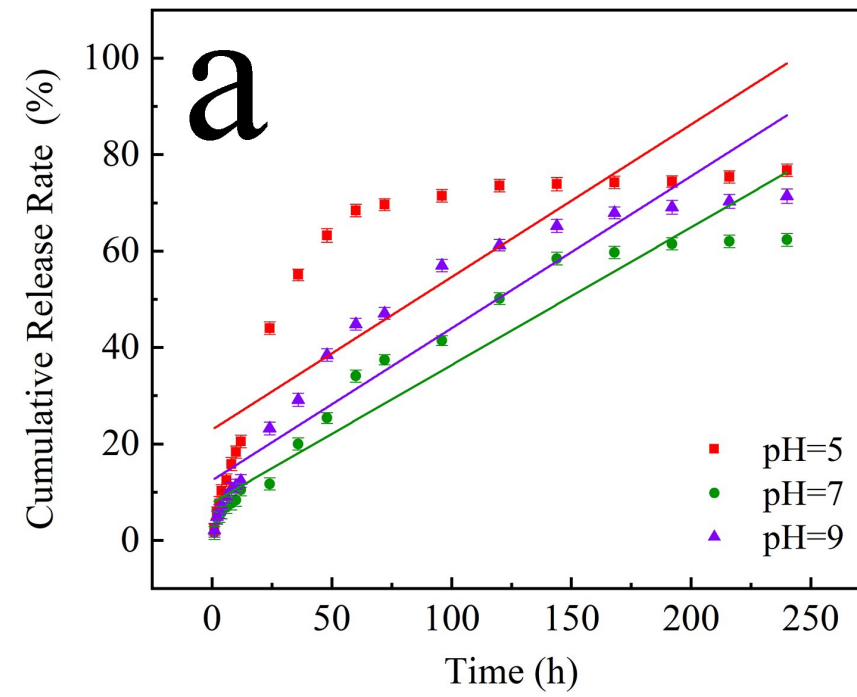

First-order model

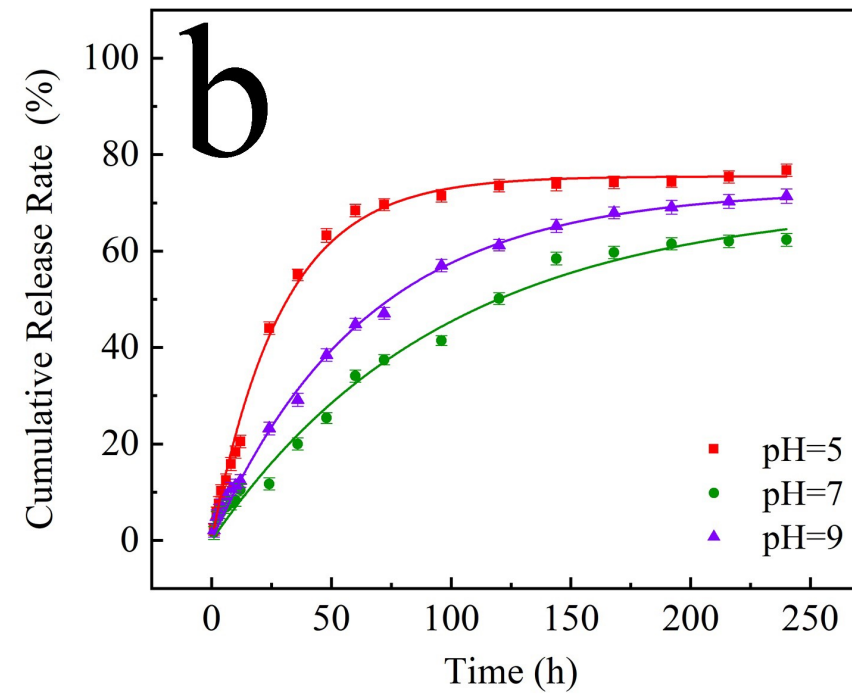

Higuchi model

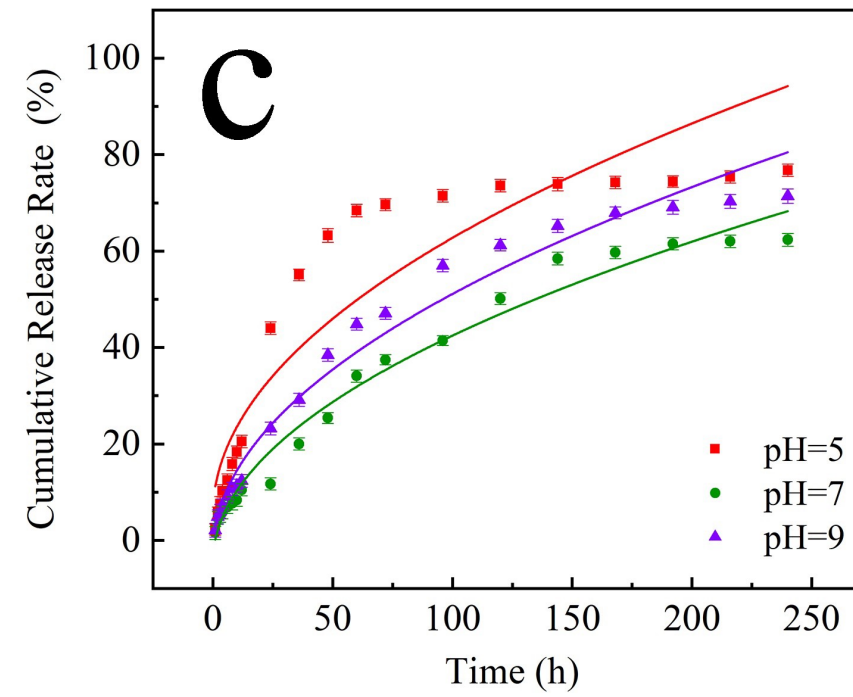

Ritger-Peppas model

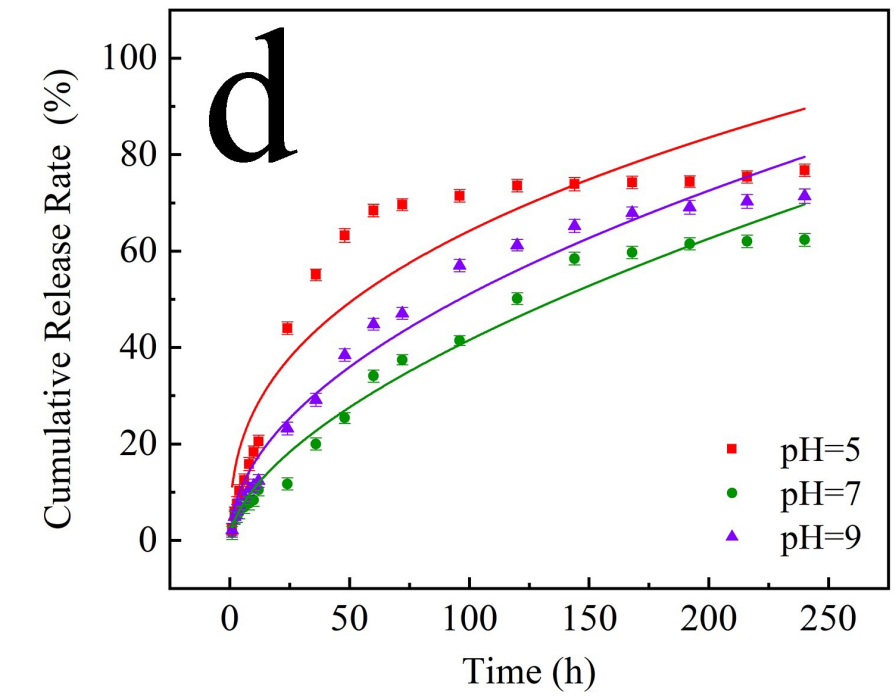

Zero-order model

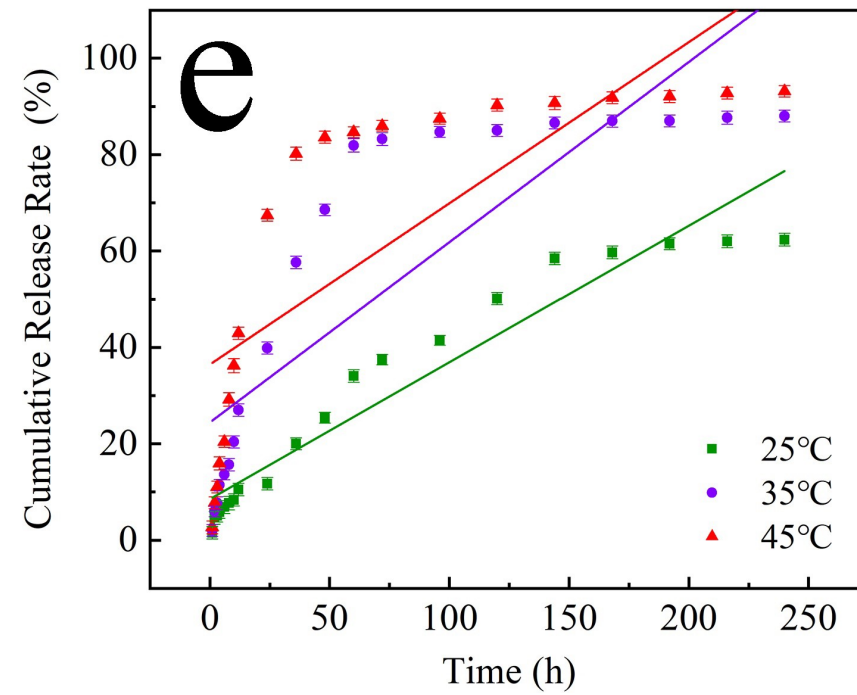

First-order model

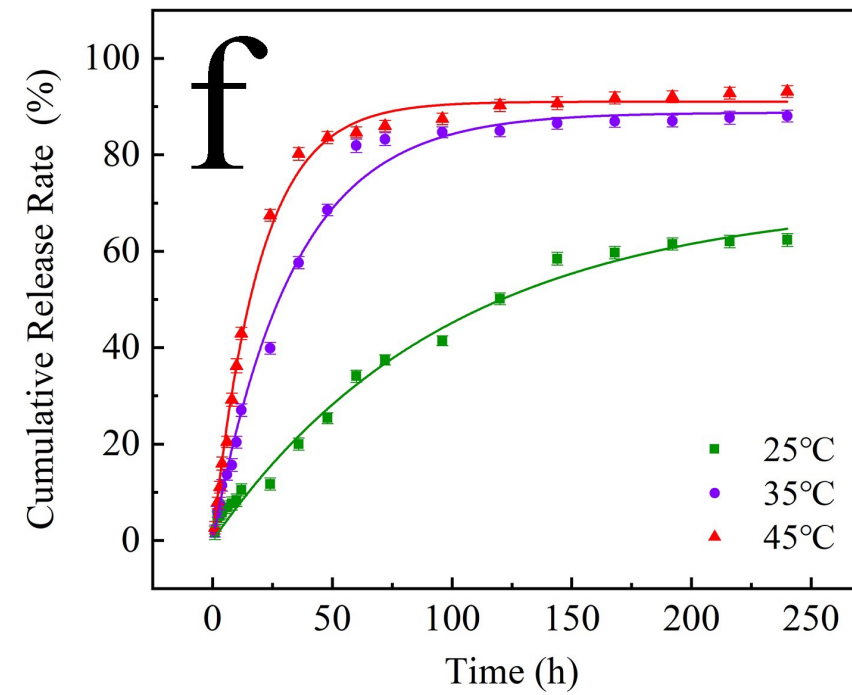

Higuchi model

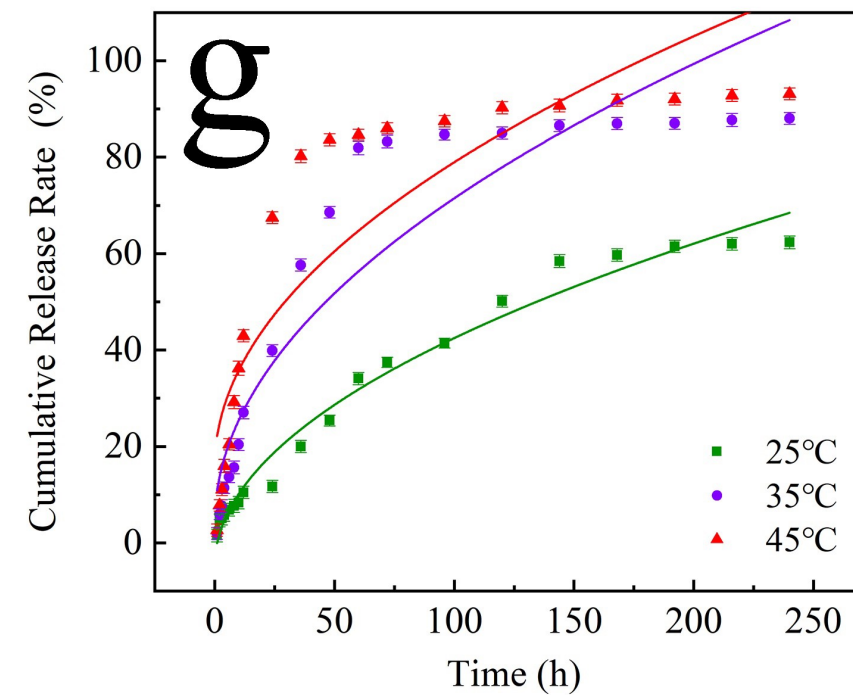

Ritger-Peppas model

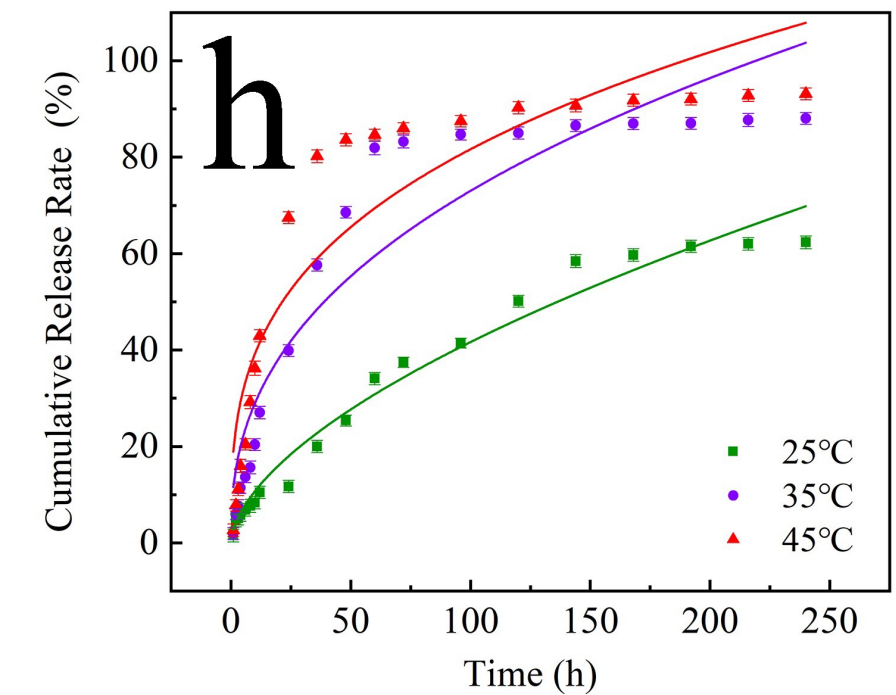

Supplement: d2en00226d2.pdf [file d2en00226d2.pdf]
