# Supplementary material for: Synthesis, antifungal evaluation, and safety assessment of mesoporous silica nanoparticles loaded with prothioconazole against crop pathogens
Source: Royal Society of Chemistry journal article supplement (doi:10.1039/d2en00226d), 2022-01-01
Supplement: d2en00226d3.pdf [file d2en00226d3.pdf]

## Supplementary Material

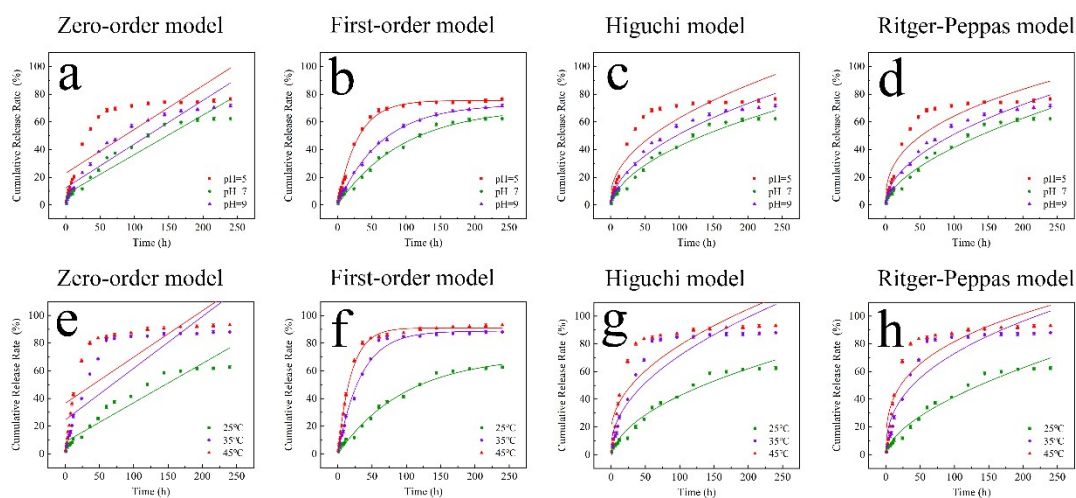

**Fig.S1** Fitting results of the kinetic model of the release curves of Prot@MSNs at different pH (a–d) and temperature (e–h).
